# Supplementary material for: Options for modulating intra-specific competition in colonial pinnipeds: the case of harbour seals (Phoca vitulina) in the Wadden Sea
Source: PeerJ. 2015 Jun 9;3:e957. doi: 10.7717/peerj.957 (PMC4465952; doi:10.7717/peerj.957)
Supplement: Data S1 [file peerj-03-957-s001.xlsx]

## Sheet: GeneralTable
ID	Location	Sex	Tagged date	N° of UDives	Mean maximum dive depth (m)	Mean dive duration (s)	Weight (Kg)	Length (cm)
1	DK	Male	2001-03-20	16345	15.0779	237.291	91	178
2	DK	Male	2004-04-16	20542	16.301	200.888	86	170
3	DK	Male	2004-09-18	8041	16.8011	163.11	-	-
4	DK	Male	2004-09-18	23157	17.1733	161.431	66	155
5	DK	Male	2004-09-18	14340	15.6509	171.291	69	173
6	DK	Male	2006-05-06	8047	22.1141	145.044	-	-
7	DK	Male	2006-05-08	18704	19.6746	137.728	35	130
8	DK	Female	2005-11-26	3305	12.5817	213.427	82	156
9	LP	Male	2005-04-13	1326	9.29173	215.932	71	164
10	LP	Male	2005-04-15	1836	13.3798	227.554	96	180
11	LP	Male	2005-04-17	2240	12.4469	224.312	93	174
12	LP	Male	2005-04-25	13074	17.0762	151.153	42	150
13	LP	Male	2005-10-13	187	12.1755	187.242	81	197
14	LP	Male	2005-10-13	157	8.83164	153.484	39	125
15	LP	Male	2006-04-20	16423	19.0834	214.114	80	170
16	LP	Male	2006-04-22	16966	15.0653	214.781	95	170
17	LP	Female	2004-08-25	13125	13.2615	182.993	55	150
18	LP	Female	2004-12-02	6462	16.475	247.792	84	174
19	LP	Female	2004-12-02	5878	16.7313	234.594	73	160
20	LP	Female	2004-12-02	745	16.07	261.358	75	152
21	LP	Female	2005-04-12	17682	10.2377	186.807	81	175
22	LP	Female	2005-04-13	16721	13.3986	194.232	98	150
23	LP	Female	2006-04-20	1092	7.60067	168.577	-	-
24	HE	Male	2006-04-13	8773	14.1912	188.728	95	160
25	HE	Male	2006-04-17	4776	14.1279	124.453	55	142
26	HE	Male	2006-04-20	975	8.36509	118.433	53	145
27	HE	Male	2005-09-27	1443	21.0191	235.19	75	169
28	HE	Male	2005-09-27	1165	10.7177	157.431	67	163
29	HE	Male	2006-09-26	18406	30.3327	176.228	74	160
30	HE	Male	2006-09-27	12453	36.6122	256.896	74	160
31	HE	Male	2006-10-03	7861	16.8505	226.083	69	165
32	HE	Female	2005-04-15	2217	5.67482	195.831	101	178
33	HE	Female	2005-04-15	9247	8.19282	208.261	98	155
34	HE	Female	2006-05-01	8067	12.6725	188.901	-	-
